# Supplementary material for: Pathogen Risk Analysis for Wild Amphibian Populations Following the First Report of a Ranavirus Outbreak in Farmed American Bullfrogs (Lithobates catesbeianus) from Northern Mexico
Source: MDPI journal article supplement (doi:10.3390/v11010026), 2019-01-03
Supplement: s1 [file s1]

# Assessment

## context

### **B01. Provide the name(s) of the assessors:**

Comments: Virologist and researcher in virus affecting aquatic organisms of commercial interest and wildlife. Instituto Politecnico Nacional-CIIDIR Sinaloa

|              |                    |                                        |                        |                    |
|--------------|--------------------|----------------------------------------|------------------------|--------------------|
| Weight: None | Answer: unanswered | AValue: Cesar Marcial Escobedo-Bonilla | Confidence: unanswered | CValue: unanswered |
|--------------|--------------------|----------------------------------------|------------------------|--------------------|

### **B02. Provide the name of the pathogen under assessment:**

Comments: A virus pathogen causing disease and mortality to several species of amphibians, reptiles and fish

|              |                    |                       |                        |                    |
|--------------|--------------------|-----------------------|------------------------|--------------------|
| Weight: None | Answer: unanswered | AValue: Ranavirus FV3 | Confidence: unanswered | CValue: unanswered |
|--------------|--------------------|-----------------------|------------------------|--------------------|

### **B03. Provide the name of the host organism under assessment:**

Comments: a colony of this frog displayed an outbreak caused by the pathogen producing an unknown number of dead animals

|              |                    |                                 |                        |                    |
|--------------|--------------------|---------------------------------|------------------------|--------------------|
| Weight: None | Answer: unanswered | AValue: Lithobates catesbeianus | Confidence: unanswered | CValue: unanswered |
|--------------|--------------------|---------------------------------|------------------------|--------------------|

### **B04. Define the area under assessment:**

Comments: Outskirts of guasave, a small semi-rural town surrounded by fields used in agriculture of corn, beans, peppers, fruits, flowers, etc. Water canals for irrigation pass in the area

|              |                    |                                                     |                        |                    |
|--------------|--------------------|-----------------------------------------------------|------------------------|--------------------|
| Weight: None | Answer: unanswered | AValue: Northwest Mexico, Northern Sinaloa, Guasave | Confidence: unanswered | CValue: unanswered |
|--------------|--------------------|-----------------------------------------------------|------------------------|--------------------|

### **B05. This assessment is considering potential impacts within the following domains:**

Comments: target species are wild populations of amphibians including frogs, toads, salamanders, some reptiles and freshwater fish

|              |                    |                                  |                        |                    |
|--------------|--------------------|----------------------------------|------------------------|--------------------|
| Weight: None | Answer: unanswered | AValue: the environmental domain | Confidence: unanswered | CValue: unanswered |
|--------------|--------------------|----------------------------------|------------------------|--------------------|

### **B06. The Pathogen is / would be the cause of a(n) (...) infectious disease to the targets in The Area.**

Comments: it is unknown whether wild populations of amphibians harbor the pathogen, but it is possible that the pathogen be re emerging

|              |                      |                  |                        |                    |
|--------------|----------------------|------------------|------------------------|--------------------|
| Weight: None | Answer: (re)emerging | AValue: emerging | Confidence: unanswered | CValue: unanswered |
|--------------|----------------------|------------------|------------------------|--------------------|

## endemic - exposure

### **B07. Because of The Organism, the probability for The Pathogen to become increasingly prevalent within targets in The Area is:**

|              |                |             |                    |             |
|--------------|----------------|-------------|--------------------|-------------|
| Weight: None | Answer: medium | AValue: 0.5 | Confidence: medium | CValue: 0.5 |
|--------------|----------------|-------------|--------------------|-------------|

## emerging - entry

### **B08. The probability of The Pathogen to be introduced with The Organism into The Area is :**

Comments: The probability of infected organisms to enter the area carrying the pathogen is considered low assuming that the cultured frogs have a small opportunity to escape from the facility into the surrounding area

|           |             |           |                    |             |
|-----------|-------------|-----------|--------------------|-------------|
| Weight: 1 | Answer: low | AValue: 0 | Confidence: medium | CValue: 0.5 |
|-----------|-------------|-----------|--------------------|-------------|

## emerging - exposure

### **B09. The Pathogen has a(n) (...) probability to be maintained and spread within The Organism population in The Area.**

Comments: the chance that once the pathogen enters the area, it can be established within a susceptible population is medium.

|           |                |             |                    |             |
|-----------|----------------|-------------|--------------------|-------------|
| Weight: 1 | Answer: medium | AValue: 0.5 | Confidence: medium | CValue: 0.5 |
|-----------|----------------|-------------|--------------------|-------------|

### **B10. The probability for The Pathogen to be transmitted from individual Organisms to individual targets is:**

Comments: the probability of the pathogen to be transmitted from an individual to an individual target is medium, since transmission would depend on the amount of space and time available to produce such an event.

|           |                |             |                    |             |
|-----------|----------------|-------------|--------------------|-------------|
| Weight: 1 | Answer: medium | AValue: 0.5 | Confidence: medium | CValue: 0.5 |
|-----------|----------------|-------------|--------------------|-------------|

## environmental

### **B11. The Pathogen has a (...) effect on native species individuals.**

Comments: the pathogen may cause a medium to high effect on native species since susceptible species may show moderate to severe signs of disease and mortality

|           |                |             |                    |             |
|-----------|----------------|-------------|--------------------|-------------|
| Weight: 1 | Answer: medium | AValue: 0.5 | Confidence: medium | CValue: 0.5 |
|-----------|----------------|-------------|--------------------|-------------|

### **B12. The Pathogen has a (...) effect on native species populations.**

Comments: once the pathogen may become established as endemic, the effect on native susceptible populations is considered medium with outbreaks occurring once every 3 years.

|           |                |             |                    |             |
|-----------|----------------|-------------|--------------------|-------------|
| Weight: 1 | Answer: medium | AValue: 0.5 | Confidence: medium | CValue: 0.5 |
|-----------|----------------|-------------|--------------------|-------------|

## plant

### **B13. The Pathogen has a(n) (...) effect on individual plants.**

Comments: the pathogen is known to be harmless to plants

|             |                      |             |                  |           |
|-------------|----------------------|-------------|------------------|-----------|
| Weight: n/a | Answer: inapplicable | AValue: n/a | Confidence: high | CValue: 1 |
|-------------|----------------------|-------------|------------------|-----------|

### **B14. The Pathogen has a(n) (...) effect on plant populations**

Comments: the pathogen does not affect plants

|             |                      |             |                  |           |
|-------------|----------------------|-------------|------------------|-----------|
| Weight: n/a | Answer: inapplicable | AValue: n/a | Confidence: high | CValue: 1 |
|-------------|----------------------|-------------|------------------|-----------|

## animal

### **B15. The Pathogen has a(n) (...) effect on the health (physical well-being and welfare) of individual animals.**

Comments: The pathogen does not affect domestic warm-blooded animals.

|             |                      |             |                  |           |
|-------------|----------------------|-------------|------------------|-----------|
| Weight: n/a | Answer: inapplicable | AValue: n/a | Confidence: high | CValue: 1 |
|-------------|----------------------|-------------|------------------|-----------|

### **B16. The Pathogen has a(n) (...) effect on the health (physical well-being and welfare) or production of animal populations.**

Comments: The pathogen does not affect domestic warm-blooded animals.

|             |                      |             |                  |           |
|-------------|----------------------|-------------|------------------|-----------|
| Weight: n/a | Answer: inapplicable | AValue: n/a | Confidence: high | CValue: 1 |
|-------------|----------------------|-------------|------------------|-----------|

## human

### **B17. The Pathogen has a(n) (...) effect on the health (physical, mental or social well-being) of individual humans.**

Comments: The pathogen does not affect humans

|             |                      |             |                  |           |
|-------------|----------------------|-------------|------------------|-----------|
| Weight: n/a | Answer: inapplicable | AValue: n/a | Confidence: high | CValue: 1 |
|-------------|----------------------|-------------|------------------|-----------|

### **B18. The Pathogen has a(n) (...) effect on the health (physical, mental or social well-being) of the human population.**

Comments: The pathogen does not affect humans

|             |                      |             |                  |           |
|-------------|----------------------|-------------|------------------|-----------|
| Weight: n/a | Answer: inapplicable | AValue: n/a | Confidence: high | CValue: 1 |
|-------------|----------------------|-------------|------------------|-----------|

## other

### **B19. The Pathogen has a(n) (...) effect on international trade and tourism.**

Comments: so far the presence of the pathogen in cultured animals has no effect on international trade and/or tourism

Weight: 1

Answer: low

AValue: 0

Confidence: medium

CValue: 0.5

### **B20. The Pathogen has a(n) (...) effect on public attention and perception.**

Comments: so far, the public attention has not been affected by the presence of the pathogen

Weight: 1

Answer: low

AValue: 0

Confidence: medium

CValue: 0.5

# Summary

| Module                    | Score | Aggregation method | Weight | Confidence |
|---------------------------|-------|--------------------|--------|------------|
| emerging - entry score    | 0.0   | arithmetic         | 1      | 0.5        |
| emerging - exposure score | 0.5   | arithmetic         | 1      | 0.5        |
| environmental score       | 0.5   | arithmetic         | 1      | 0.5        |
| plant score               | n/a   | arithmetic         | 1      | n/a        |
| animal score              | n/a   | arithmetic         | 1      | n/a        |
| human score               | n/a   | arithmetic         | 1      | n/a        |
| other score               | 0.0   | arithmetic         | 1      | 0.5        |
| Consequence               | 0.500 | maximum            |        |            |
| Entry-Exposure            | 0.000 | geometric          |        |            |
| overall risk score        | 0.000 |                    |        |            |
