# Supplementary material for: Pathogen Risk Analysis for Wild Amphibian Populations Following the First Report of a Ranavirus Outbreak in Farmed American Bullfrogs (Lithobates catesbeianus) from Northern Mexico
Source: MDPI journal article supplement (doi:10.3390/v11010026), 2019-01-03
Supplement: s1 [file s1]

# Assessment

## context

### B01. Provide the name(s) of the assessors:

Comments: Biologist

|              |                    |                             |                        |                    |
|--------------|--------------------|-----------------------------|------------------------|--------------------|
| Weight: None | Answer: unanswered | AValue: José Manuel Serrano | Confidence: unanswered | CValue: unanswered |
|--------------|--------------------|-----------------------------|------------------------|--------------------|

### B02. Provide the name of the pathogen under assessment:

|              |                    |                   |                        |                    |
|--------------|--------------------|-------------------|------------------------|--------------------|
| Weight: None | Answer: unanswered | AValue: Ranavirus | Confidence: unanswered | CValue: unanswered |
|--------------|--------------------|-------------------|------------------------|--------------------|

### B03. Provide the name of the host organism under assessment:

|              |                    |                           |                        |                    |
|--------------|--------------------|---------------------------|------------------------|--------------------|
| Weight: None | Answer: unanswered | AValue: American bullfrog | Confidence: unanswered | CValue: unanswered |
|--------------|--------------------|---------------------------|------------------------|--------------------|

### B04. Define the area under assessment:

|              |                    |                                 |                        |                    |
|--------------|--------------------|---------------------------------|------------------------|--------------------|
| Weight: None | Answer: unanswered | AValue: Guasave, Sinaloa Mexico | Confidence: unanswered | CValue: unanswered |
|--------------|--------------------|---------------------------------|------------------------|--------------------|

### B05. This assessment is considering potential impacts within the following domains:

|              |                    |                                  |                        |                    |
|--------------|--------------------|----------------------------------|------------------------|--------------------|
| Weight: None | Answer: unanswered | AValue: the environmental domain | Confidence: unanswered | CValue: unanswered |
|--------------|--------------------|----------------------------------|------------------------|--------------------|

### B06. The Pathogen is / would be the cause of a(n) (...) infectious disease to the targets in The Area.

|              |                      |                  |                        |                    |
|--------------|----------------------|------------------|------------------------|--------------------|
| Weight: None | Answer: (re)emerging | AValue: emerging | Confidence: unanswered | CValue: unanswered |
|--------------|----------------------|------------------|------------------------|--------------------|

## endemic - exposure

### B07. Because of The Organism, the probability for The Pathogen to become increasingly prevalent within targets in The Area is:

|              |                |             |                    |             |
|--------------|----------------|-------------|--------------------|-------------|
| Weight: None | Answer: medium | AValue: 0.5 | Confidence: medium | CValue: 0.5 |
|--------------|----------------|-------------|--------------------|-------------|

## emerging - entry

### B08. The probability of The Pathogen to be introduced with The Organism into The Area is :

|           |              |           |                    |             |
|-----------|--------------|-----------|--------------------|-------------|
| Weight: 1 | Answer: high | AValue: 1 | Confidence: medium | CValue: 0.5 |
|-----------|--------------|-----------|--------------------|-------------|

## emerging - exposure

### B09. The Pathogen has a(n) (...) probability to be maintained and spread within The Organism population in The Area.

|           |                |             |                  |           |
|-----------|----------------|-------------|------------------|-----------|
| Weight: 1 | Answer: medium | AValue: 0.5 | Confidence: high | CValue: 1 |
|-----------|----------------|-------------|------------------|-----------|

### B10. The probability for The Pathogen to be transmitted from individual Organisms to individual targets is:

|           |              |           |                    |             |
|-----------|--------------|-----------|--------------------|-------------|
| Weight: 1 | Answer: high | AValue: 1 | Confidence: medium | CValue: 0.5 |
|-----------|--------------|-----------|--------------------|-------------|

## environmental

**B11. The Pathogen has a (...) effect on native species individuals.**

Weight: 1

Answer: high

AValue: 1

Confidence: high

CValue: 1

**B12. The Pathogen has a (...) effect on native species populations.**

Weight: 1

Answer: high

AValue: 0.75

Confidence: medium

CValue: 0.5

## plant

**B13. The Pathogen has a(n) (...) effect on individual plants.**

Weight: n/a

Answer: inapplicable

AValue: n/a

Confidence: high

CValue: 1

**B14. The Pathogen has a(n) (...) effect on plant populations**

Weight: n/a

Answer: inapplicable

AValue: n/a

Confidence: high

CValue: 1

## animal

**B15. The Pathogen has a(n) (...) effect on the health (physical well-being and welfare) of individual animals.**

Weight: n/a

Answer: inapplicable

AValue: n/a

Confidence: high

CValue: 1

**B16. The Pathogen has a(n) (...) effect on the health (physical well-being and welfare) or production of animal populations.**

Weight: n/a

Answer: inapplicable

AValue: n/a

Confidence: high

CValue: 1

## human

**B17. The Pathogen has a(n) (...) effect on the health (physical, mental or social well-being) of individual humans.**

Weight: n/a

Answer: inapplicable

AValue: n/a

Confidence: high

CValue: 1

**B18. The Pathogen has a(n) (...) effect on the health (physical, mental or social well-being) of the human population.**

Weight: n/a

Answer: inapplicable

AValue: n/a

Confidence: high

CValue: 1

## other

**B19. The Pathogen has a(n) (...) effect on international trade and tourism.**

Weight: 1

Answer: medium

AValue: 0.5

Confidence: medium

CValue: 0.5

**B20. The Pathogen has a(n) (...) effect on public attention and perception.**

Weight: 1

Answer: low

AValue: 0

Confidence: medium

CValue: 0.5

# Summary

| Module                    | Score | Aggregation method | Weight | Confidence |
|---------------------------|-------|--------------------|--------|------------|
| emerging - entry score    | 1.0   | arithmetic         | 1      | 0.5        |
| emerging - exposure score | 0.75  | arithmetic         | 1      | 0.75       |
| environmental score       | 0.875 | arithmetic         | 1      | 0.75       |
| plant score               | n/a   | arithmetic         | 1      | n/a        |
| animal score              | n/a   | arithmetic         | 1      | n/a        |
| human score               | n/a   | arithmetic         | 1      | n/a        |
| other score               | 0.25  | arithmetic         | 1      | 0.5        |
| Consequence               | 0.875 | maximum            |        |            |
| Entry-Exposure            | 0.866 | geometric          |        |            |
| overall risk score        | 0.758 |                    |        |            |
