# Supplementary material for: Pathogen Risk Analysis for Wild Amphibian Populations Following the First Report of a Ranavirus Outbreak in Farmed American Bullfrogs (Lithobates catesbeianus) from Northern Mexico
Source: MDPI journal article supplement (doi:10.3390/v11010026), 2019-01-03
Supplement: s1 [file s1]

Supplementary File S1. Comparison of genomic identity between Mexican ranavirus and other ranaviruses.

ORF13L Hypothetical protein gene, GenBank accession no. MK204475

| <u>Ranavirus isolates</u>                                | <u>Genomic identity</u> | <u>GenBank no.</u> |
|----------------------------------------------------------|-------------------------|--------------------|
| Frog virus 3                                             | 99.64%                  | AY548484           |
| Frog virus 3 isolate SSME                                | 99.28%                  | KJ175144           |
| Rana grylio iridovirus                                   | 99.64%                  | JQ654586           |
| Soft-shelled turtle iridovirus                           | 99.64%                  | EU627010           |
| Frog virus 3 isolate Op/2015/Netherlands/UU3150324001    | 97.50%                  | MF360246           |
| Testudo hermanni ranavirus isolate CH8/96                | 97.50%                  | KP266741           |
| Chinese giant salamander iridovirus isolate CGSIV-HN1104 | 97.50%                  | KF512820           |
| Andrias davidianus ranavirus isolate 2010SX              | 97.50%                  | KF033124           |
| Andrias davidianus ranavirus isolate 1201                | 97.50%                  | KC865735           |
| Bosca's newt virus isolate GA11001                       | 96.80%                  | KJ703145           |
| Common midwife toad virus PE11114                        | 96.11%                  | KJ703147           |
| Common midwife toad virus                                | 95.75%                  | JQ231222           |
| Tiger frog virus                                         | 96.08%                  | AF389451           |
| Tortoise ranavirus                                       | 95.05%                  | KP266743           |
| Ambystoma tigrinum stebbensi virus                       | 93.59%                  | AY150217           |
| Epizootic hematopoietic necrosis virus                   | 92.90%                  | FJ433873           |
| European sheatfish virus                                 | 92.90%                  | JQ724856           |

ORF22L Proliferating cell nuclear antigen gene , GenBank accession no. MK204476

| Ranavirus isolates                                               | Genomic identity | GenBank no. |
|------------------------------------------------------------------|------------------|-------------|
| Frog virus 3                                                     | 100%             | AY548484    |
| Frog virus 3 isolate SSME                                        | 100%             | KJ175144    |
| Frog virus 3 isolate Op/2015/Netherlands/UU3150324001            | 99.36%           | MF360246    |
| Rana grylio iridovirus                                           | 99.36%           | JQ654586    |
| Soft-shelled turtle iridovirus                                   | 99.36%           | EU627010    |
| Testudo hermanni ranavirus isolate CH8/96                        | 98.73%           | KP266741    |
| Chinese giant salamander iridovirus isolate CGSIV-HN1104         | 98.73%           | KF512820    |
| Andrias davidianus ranavirus isolate 2010SX                      | 98.73%           | KF033124    |
| Andrias davidianus ranavirus isolate 1201                        | 98.73%           | KC865735    |
| Common midwife toad virus PE11114                                | 98.73%           | KJ703152    |
| Common midwife toad virus                                        | 98.73%           | JQ231222    |
| European sheatfish virus                                         | 98.42%           | JQ724856    |
| Bosca's newt virus isolate GA11001                               | 98.10%           | KJ703143    |
| Tiger frog virus                                                 | 98.10%           | AF389451    |
| Epizootic hematopoietic necrosis virus                           | 98.10%           | FJ433873    |
| Tortoise ranavirus                                               | 97.47%           | KP266743    |
| Ambystoma tigrinum stebbensi virus                               | 96.52%           | AY150217    |
| ORF59R Hypothetical protein gene, GenBank accession no. MK204477 |                  |             |

| Ranavirus isolates                                       | Genomic identity | GenBank no. |
|----------------------------------------------------------|------------------|-------------|
| Frog virus 3                                             | 100%             | AY548484    |
| Frog virus 3 isolate SSME                                | 100%             | KJ175144    |
| Frog virus 3 isolate Op/2015/Netherlands/UU3150324001    | 100%             | MF360246    |
| Rana grylio iridovirus                                   | 100%             | JQ654586    |
| Soft-shelled turtle iridovirus                           | 100%             | EU627010    |
| Bosca's newt virus isolate GA11001                       | 99.66%           | KJ703139    |
| Testudo hermanni ranavirus isolate CH8/96                | 99.33%           | KP266741    |
| Chinese giant salamander iridovirus isolate CGSIV-HN1104 | 99.33%           | KF512820    |
| Andrias davidianus ranavirus isolate 2010SX              | 99.33%           | KF033124    |
| Andrias davidianus ranavirus isolate 1201                | 99.33%           | KC865735    |
| Common midwife toad virus PE11114                        | 99.33%           | KJ703147    |
| Common midwife toad virus                                | 99.33%           | JQ231222    |
| Tiger frog virus                                         | 99.33%           | AF389451    |
| Epizootic hematopoietic necrosis virus                   | 99.33%           | FJ433873    |
| Tortoise ranavirus                                       | 98.66%           | KP266743    |
| European sheatfish virus                                 | 98.66%           | JQ724856    |
| Ambystoma tigrinum stebbensi virus                       | 96.66%           | AY150217    |

ORF82L p31K gene, GenBank accession no. MK204478

| Ranavirus isolates                                       | Genomic identity | GenBank no. |
|----------------------------------------------------------|------------------|-------------|
| Frog virus 3                                             | 100%             | AY548484    |
| Frog virus 3 isolate SSME                                | 100%             | KJ175144    |
| Frog virus 3 isolate Op/2015/Netherlands/UU3150324001    | 100%             | MF360246    |
| Rana grylio iridovirus                                   | 99.07%           | JQ654586    |
| Soft-shelled turtle iridovirus                           | 99.07%           | EU627010    |
| Testudo hermanni ranavirus isolate CH8/96                | 99.07%           | KP266741    |
| Chinese giant salamander iridovirus isolate CGSIV-HN1104 | 99.07%           | KF512820    |
| Andrias davidianus ranavirus isolate 2010SX              | 99.07%           | KF033124    |
| Andrias davidianus ranavirus isolate 1201                | 99.07%           | KC865735    |
| Common midwife toad virus                                | 98.76%           | JQ231222    |
| Common midwife toad virus PE11114                        | 99.38%           | KJ703160    |
| Tortoise ranavirus                                       | 98.76%           | KP266743    |
| Tiger frog virus                                         | 98.46%           | AF389451    |
| Epizootic hematopoietic necrosis virus                   | 98.46%           | FJ433873    |
| Bosca's newt virus isolate GA11001                       | 98.48%           | KJ703122    |
| European sheatfish virus                                 | 98.15%           | JQ724856    |
| Ambystoma tigrinum stebbensi virus                       | 96.92%           | AY150217    |

ORF 16L Major capsid protein gene GenBank accession no. MH247258

| Ranavirus isolates                                       | Genomic identity | GenBank no. |
|----------------------------------------------------------|------------------|-------------|
| Frog virus 3                                             | 100%             | AY548484    |
| Frog virus 3 isolate SSME                                | 100%             | KJ175144    |
| Rana grylio iridovirus                                   | 99.78%           | JQ654586    |
| Soft-shelled turtle iridovirus                           | 99.78%           | EU627010    |
| Frog virus 3 isolate Op/2015/Netherlands/UU3150324001    | 99.78%           | MF360246    |
| Common midwife toad virus PE11114                        | 98.70%           | KJ703125    |
| Common midwife toad virus                                | 98.70%           | JQ231222    |
| Testudo hermanni ranavirus isolate CH8/96                | 98.48%           | KP266741    |
| Chinese giant salamander iridovirus isolate CGSIV-HN1104 | 98.48%           | KF512820    |
| Andrias davidianus ranavirus isolate 2010SX              | 98.48%           | KF033124    |
| Andrias davidianus ranavirus isolate 1201                | 98.48%           | KC865735    |
| Bosca's newt virus isolate GA11001                       | 98.48%           | KJ703143    |
| Tiger frog virus                                         | 98.48%           | AF389451    |
| Tortoise ranavirus                                       | 98.48%           | KP266743    |
| Epizootic hematopoietic necrosis virus                   | 97.83%           | FJ433873    |
| European sheatfish virus                                 | 97.18%           | JQ724856    |
| Ambystoma tigrinum stebbensi virus                       | 95.88%           | AY150217    |
