# Supplementary material for: Pathogen Risk Analysis for Wild Amphibian Populations Following the First Report of a Ranavirus Outbreak in Farmed American Bullfrogs (Lithobates catesbeianus) from Northern Mexico
Source: MDPI journal article supplement (doi:10.3390/v11010026), 2019-01-03
Supplement: s1 [file s1]

# Assessment

## context

### B01. Provide the name(s) of the assessors:

Comments: Specialist in ecology and wildlife

|              |                    |                                  |                        |                    |
|--------------|--------------------|----------------------------------|------------------------|--------------------|
| Weight: None | Answer: unanswered | AValue: Mónica Jacinto-Maldonado | Confidence: unanswered | CValue: unanswered |
|--------------|--------------------|----------------------------------|------------------------|--------------------|

### B02. Provide the name of the pathogen under assessment:

|              |                    |                   |                        |                    |
|--------------|--------------------|-------------------|------------------------|--------------------|
| Weight: None | Answer: unanswered | AValue: Ranavirus | Confidence: unanswered | CValue: unanswered |
|--------------|--------------------|-------------------|------------------------|--------------------|

### B03. Provide the name of the host organism under assessment:

|              |                    |                           |                        |                    |
|--------------|--------------------|---------------------------|------------------------|--------------------|
| Weight: None | Answer: unanswered | AValue: American bullfrog | Confidence: unanswered | CValue: unanswered |
|--------------|--------------------|---------------------------|------------------------|--------------------|

### B04. Define the area under assessment:

|              |                    |                         |                        |                    |
|--------------|--------------------|-------------------------|------------------------|--------------------|
| Weight: None | Answer: unanswered | AValue: Guasave Sinaloa | Confidence: unanswered | CValue: unanswered |
|--------------|--------------------|-------------------------|------------------------|--------------------|

### B05. This assessment is considering potential impacts within the following domains:

|              |                    |                                  |                        |                    |
|--------------|--------------------|----------------------------------|------------------------|--------------------|
| Weight: None | Answer: unanswered | AValue: the environmental domain | Confidence: unanswered | CValue: unanswered |
|--------------|--------------------|----------------------------------|------------------------|--------------------|

### B06. The Pathogen is / would be the cause of a(n) (...) infectious disease to the targets in The Area.

Comments: In Guasave there is a large amount of amphibians (37 amphibians in wildlife) which might be at risk

|              |                      |                  |                        |                    |
|--------------|----------------------|------------------|------------------------|--------------------|
| Weight: None | Answer: (re)emerging | AValue: emerging | Confidence: unanswered | CValue: unanswered |
|--------------|----------------------|------------------|------------------------|--------------------|

## endemic - exposure

### B07. Because of The Organism, the probability for The Pathogen to become increasingly prevalent within targets in The Area is:

Comments: The probability is medium (moderate) since contaminated water from the farm is not treated prior to disposal through the sewage and virus-contaminated water can infect amphibians from wildlife

|              |                |             |                    |             |
|--------------|----------------|-------------|--------------------|-------------|
| Weight: None | Answer: medium | AValue: 0.5 | Confidence: medium | CValue: 0.5 |
|--------------|----------------|-------------|--------------------|-------------|

## emerging - entry

### B08. The probability of The Pathogen to be introduced with The Organism into The Area is :

Comments: Very probable since amphibians live in the area that can have contact through the pathogen in water

|           |                |             |                    |             |
|-----------|----------------|-------------|--------------------|-------------|
| Weight: 1 | Answer: medium | AValue: 0.5 | Confidence: medium | CValue: 0.5 |
|-----------|----------------|-------------|--------------------|-------------|

## emerging - exposure

### **B09. The Pathogen has a(n) (...) probability to be maintained and spread within The Organism population in The Area.**

Comments: Once the pathogen gets access to wildlife it has the possibility to affect susceptible amphibians. Infection is dependent on life stage and adults may act as carriers.

|           |              |           |                    |             |
|-----------|--------------|-----------|--------------------|-------------|
| Weight: 1 | Answer: high | AValue: 1 | Confidence: medium | CValue: 0.5 |
|-----------|--------------|-----------|--------------------|-------------|

### **B10. The probability for The Pathogen to be transmitted from individual Organisms to individual targets is:**

Comments: There is a great possibility since the pathogen may access water which may infect amphibian larvae, reptiles and fish

|           |              |           |                    |             |
|-----------|--------------|-----------|--------------------|-------------|
| Weight: 1 | Answer: high | AValue: 1 | Confidence: medium | CValue: 0.5 |
|-----------|--------------|-----------|--------------------|-------------|

## environmental

### **B11. The Pathogen has a (...) effect on native species individuals.**

Comments: Yes it is very possible that it has an effect since families from these endemic amphibian species have also been affected by ranaviruses

|           |              |           |                  |           |
|-----------|--------------|-----------|------------------|-----------|
| Weight: 1 | Answer: high | AValue: 1 | Confidence: high | CValue: 1 |
|-----------|--------------|-----------|------------------|-----------|

### **B12. The Pathogen has a (...) effect on native species populations.**

|           |              |              |                  |           |
|-----------|--------------|--------------|------------------|-----------|
| Weight: 1 | Answer: high | AValue: 0.75 | Confidence: high | CValue: 1 |
|-----------|--------------|--------------|------------------|-----------|

## plant

### **B13. The Pathogen has a(n) (...) effect on individual plants.**

Comments: The pathogen does not affect plants

|             |                      |             |                  |           |
|-------------|----------------------|-------------|------------------|-----------|
| Weight: n/a | Answer: inapplicable | AValue: n/a | Confidence: high | CValue: 1 |
|-------------|----------------------|-------------|------------------|-----------|

### **B14. The Pathogen has a(n) (...) effect on plant populations**

Comments: The pathogen does not affect plants

|             |                      |             |                  |           |
|-------------|----------------------|-------------|------------------|-----------|
| Weight: n/a | Answer: inapplicable | AValue: n/a | Confidence: high | CValue: 1 |
|-------------|----------------------|-------------|------------------|-----------|

## animal

### **B15. The Pathogen has a(n) (...) effect on the health (physical well-being and welfare) of individual animals.**

Comments: The pathogen only affects cold-blooded vertebrates

|             |                      |             |                  |           |
|-------------|----------------------|-------------|------------------|-----------|
| Weight: n/a | Answer: inapplicable | AValue: n/a | Confidence: high | CValue: 1 |
|-------------|----------------------|-------------|------------------|-----------|

### **B16. The Pathogen has a(n) (...) effect on the health (physical well-being and welfare) or production of animal populations.**

Comments: The pathogen only affects cold-blooded vertebrates

|             |                      |             |                  |           |
|-------------|----------------------|-------------|------------------|-----------|
| Weight: n/a | Answer: inapplicable | AValue: n/a | Confidence: high | CValue: 1 |
|-------------|----------------------|-------------|------------------|-----------|

## human

### **B17. The Pathogen has a(n) (...) effect on the health (physical, mental or social well-being) of individual humans.**

Comments: Ranavirus does not affect humans

|             |                      |             |                  |           |
|-------------|----------------------|-------------|------------------|-----------|
| Weight: n/a | Answer: inapplicable | AValue: n/a | Confidence: high | CValue: 1 |
|-------------|----------------------|-------------|------------------|-----------|

### **B18. The Pathogen has a(n) (...) effect on the health (physical, mental or social well-being) of the human population.**

Comments: Ranavirus does not affect humans

|             |                      |             |                  |           |
|-------------|----------------------|-------------|------------------|-----------|
| Weight: n/a | Answer: inapplicable | AValue: n/a | Confidence: high | CValue: 1 |
|-------------|----------------------|-------------|------------------|-----------|

## other

**B19. The Pathogen has a(n) (...) effect on international trade and tourism.**

Weight: 1

Answer: medium

AValue: 0.5

Confidence: medium

CValue: 0.5

**B20. The Pathogen has a(n) (...) effect on public attention and perception.**

Weight: 1

Answer: high

AValue: 1

Confidence: medium

CValue: 0.5

# Summary

| Module                    | Score | Aggregation method | Weight | Confidence |
|---------------------------|-------|--------------------|--------|------------|
| emerging - entry score    | 0.5   | arithmetic         | 1      | 0.5        |
| emerging - exposure score | 1.0   | arithmetic         | 1      | 0.5        |
| environmental score       | 0.875 | arithmetic         | 1      | 1.0        |
| plant score               | n/a   | arithmetic         | 1      | n/a        |
| animal score              | n/a   | arithmetic         | 1      | n/a        |
| human score               | n/a   | arithmetic         | 1      | n/a        |
| other score               | 0.75  | arithmetic         | 1      | 0.5        |
| Consequence               | 0.875 | maximum            |        |            |
| Entry-Exposure            | 0.707 | geometric          |        |            |
| overall risk score        | 0.619 |                    |        |            |
